# Supplementary material for: Routing stemflow water through the soil via preferential flow: a dual-labelling approach with artificial tracers
Source: Copernicus journal article supplement (doi:10.5194/hess-27-2865-2023), 2023-08-01
Supplement: Supplementary file 1 [file hess-27-2865-2023-supplement.pdf]

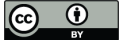

*Supplement of*

## **Routing stemflow water through the soil via preferential flow: a dual-labelling approach with artificial tracers**

**Juan Pinos et al.**

*Correspondence to:* Juan Pinos ([juan.pinos@idaea.csic.es](mailto:juan.pinos@idaea.csic.es))

The copyright of individual parts of the supplement might differ from the article licence.

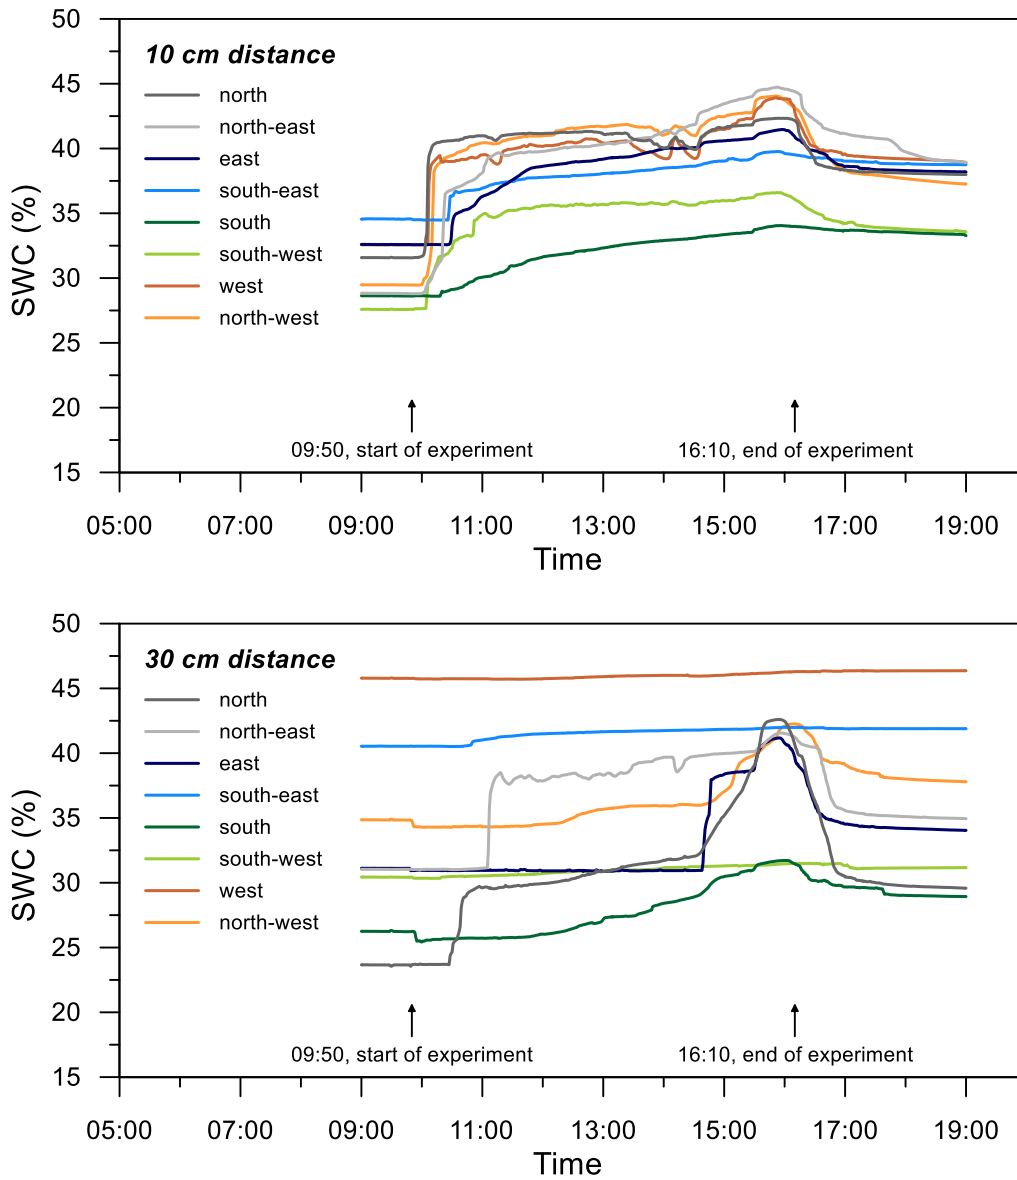

**Figure S1.** Temporal evolution of volumetric soil water content (SWC) at 1-min resolution derived from TDR sensors along the four cardinal and the four intercardinal directions at 10 cm distance to the trunk (top) and 30 cm distance (bottom).

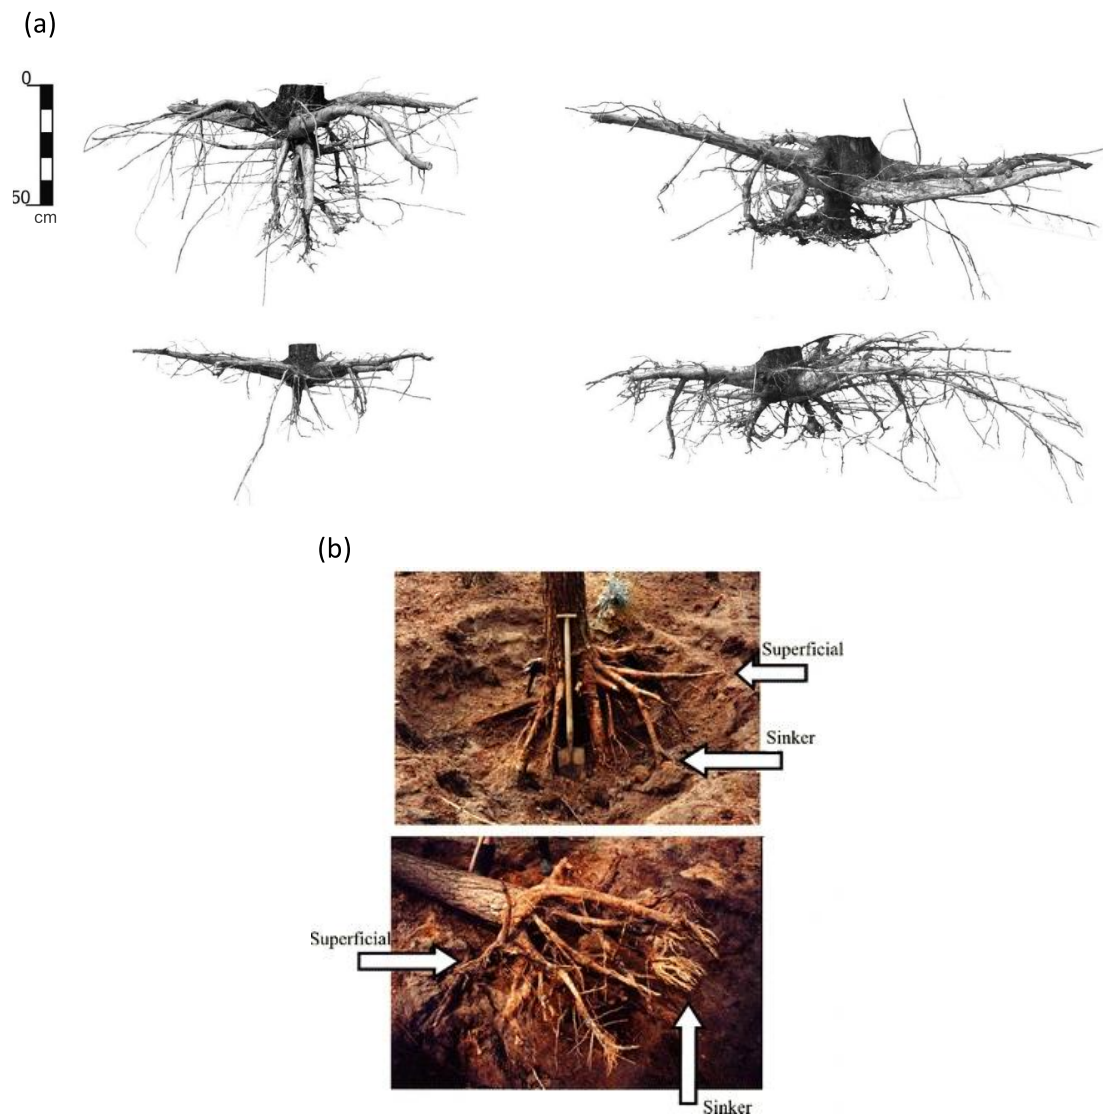

**Figure S2.** Examples of Scots pine root system architecture. Source (a) Pietrzykowski et al. (2017), *Forest Research Papers*, 78, 323–331. <https://doi.org/10.1515/frp-2017-0036>; and (b) Čermák et al. (2008), *Plant and Soil*, 305(1), 61–75. <https://doi.org/10.1007/s11104-007-9433-z>. Figures are reproduced based on open access Creative Commons Attribution License.

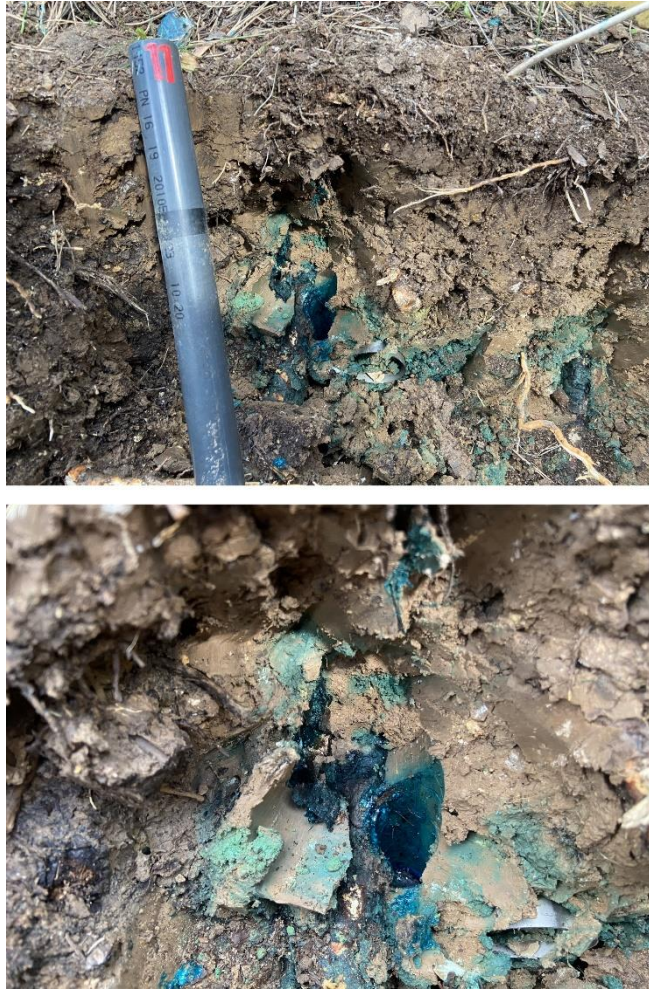

**Figure S3.** Dye colored water observed at mini-piezometer wt-W20, located next to the west TDR probe (30 cm distance from tree trunk; swc-W30).

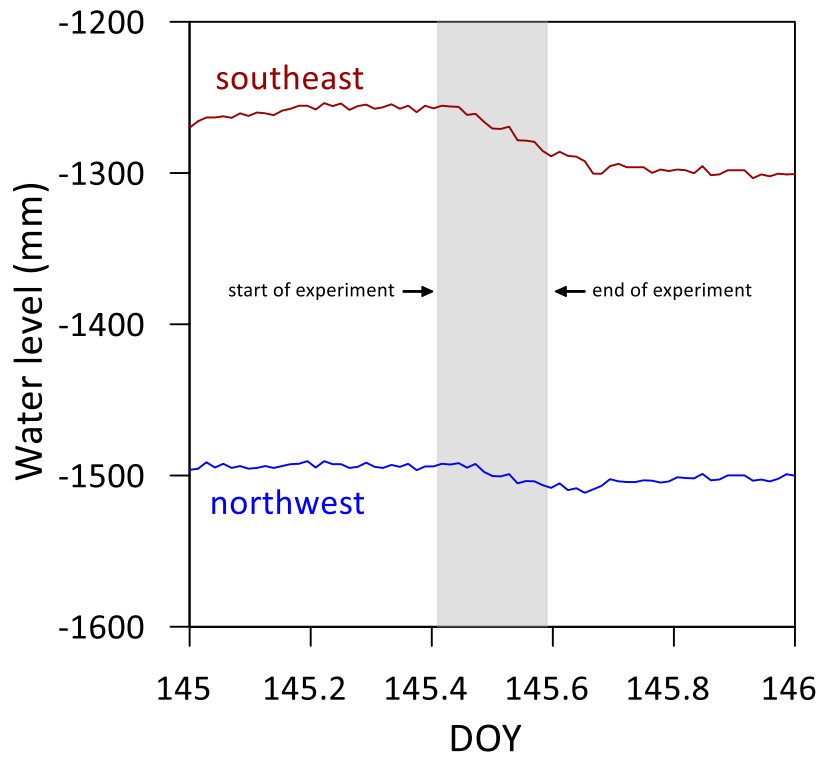

**Figure S4.** Dynamics of groundwater table at 20 min resolution in the southeast and northwest deep piezometers. Gray area indicates the time period of the stemflow experiment. DOY = day of the year.

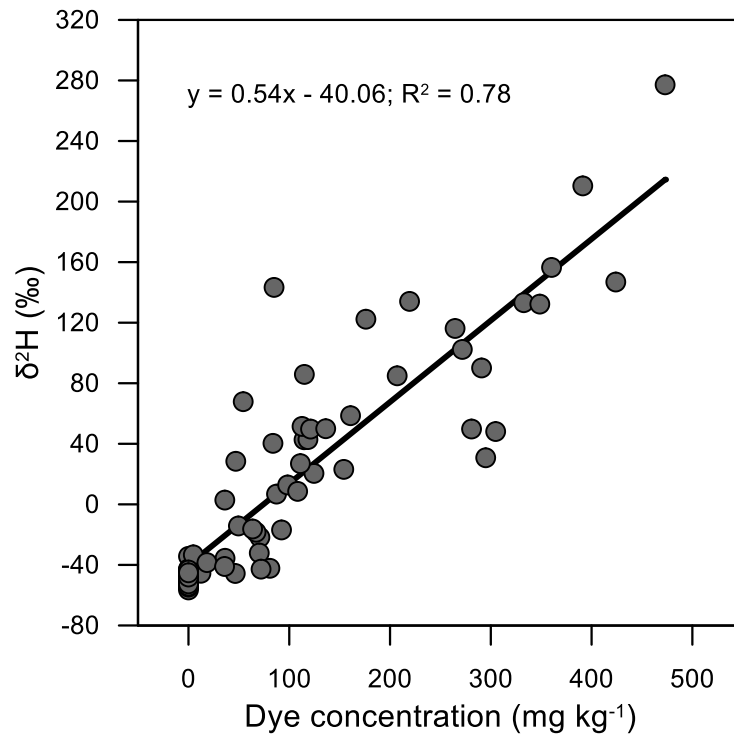

**Figure S5.** Relationship between deuterium isotopic composition and Brilliant Blue FCF dye concentration for the 63 soil samples taken from the 12 profiles excavated after the stemflow experiment.

**Table S1.** Maximum concentrations of Brilliant Blue FCF and deuterium isotopic compositions in soil profiles for the different cardinal directions and distances from the trunk.

| Profile | Distance from the tree trunk (cm) | <i>n</i> | Brilliant Blue FCF       | Deuterium |
|---------|-----------------------------------|----------|--------------------------|-----------|
|         |                                   |          | Max.                     |           |
|         |                                   |          | mg kg <sup>-1</sup> soil | ‰         |
| PN1     | 40                                | 8        | 92.33                    | -14.27    |
| PN2     | 25                                | 6        | 176.04                   | 122.30    |
| PN3     | 10                                | 6        | 472.96                   | 277.14    |
| PE1     | 40                                | 6        | 124.52                   | 51.47     |
| PE2     | 25                                | 5        | 280.89                   | 102.32    |
| PE3     | 10                                | 4        | 348.63                   | 132.27    |
| PS1     | 40                                | 6        | 114.65                   | 42.69     |
| PS2     | 25                                | 6        | 154.11                   | 23.09     |
| PS3     | 10                                | 6        | 332.68                   | 134.06    |
| PW1     | 40                                | 2        | 0                        | -51.53    |
| PW2     | 25                                | 4        | 360.28                   | 156.49    |
| PW3     | 10                                | 4        | 391.26                   | 210.35    |

*n* indicates the number of samples.

**Table S2.** Brilliant Blue FCF dye concentration of the water samples taken from the mini-piezometers (wt) during the stemflow experiment.

| Time         | NW20                                                           | N50 | N20 | NE20 | E20 | E50 | SE20 | S20  | S50 | SW20 | W20  | W50 |
|--------------|----------------------------------------------------------------|-----|-----|------|-----|-----|------|------|-----|------|------|-----|
|              | <b>Brilliant Blue FCF dye concentration (g L<sup>-1</sup>)</b> |     |     |      |     |     |      |      |     |      |      |     |
| <b>10:45</b> | †                                                              | †   | †   | †    | †   | †   | †    | †    | †   | †    | †    | †   |
| <b>11:50</b> | †                                                              | †   | †   | ‡    | †   | †   | 4.96 | ‡    | †   | †    | ‡    | †   |
| <b>12:45</b> | †                                                              | †   | †   | ‡    | ‡   | †   | 4.74 | 4.59 | †   | †    | 5.40 | †   |
| <b>13:45</b> | †                                                              | †   | †   | 5.34 | ‡   | †   | 5.11 | 4.86 | †   | ‡    | 5.80 | †   |
| <b>14:45</b> | †                                                              | †   | †   | 5.89 | ‡   | †   | 5.52 | 5.31 | †   | ‡    | 5.77 | †   |
| <b>15:45</b> | †                                                              | †   | ‡   | 6.31 | ‡   | ‡   | 5.97 | 5.60 | †   | ‡    | 5.89 | †   |

† Denotes that no water was recorded and ‡ that the level was not sufficient for a sample to be taken.
